# Supplementary material for: pH-Sensitive oligopeptide magnetic mesoporous silica beads for deoxyribonucleic acid extraction
Source: Royal Society of Chemistry journal article supplement (doi:10.1039/d4na00987h), 2025-01-01
Supplement: d4na00987h1.pdf [file d4na00987h1.pdf]

## Supporting Information

### **pH-sensitive oligopeptide magnetic mesoporous silica beads for deoxyribonucleic acid extraction**

Sihua Qian,<sup>+b</sup> Yiting Wang,<sup>+a,b</sup> Junjie Fan,<sup>b</sup> Tong Kong,<sup>b</sup> Yuhui Wang,<sup>b</sup> Kaizhe Wang,<sup>b</sup> Yufeng Liao,<sup>\*c</sup> Li Wang<sup>\*a</sup> and Jianping Zheng<sup>\*b</sup>

<sup>a</sup> College of Chemistry, Jilin Normal University, Siping 136000, P. R. China.

<sup>b</sup> Ningbo Cixi institute of Biomedical Engineering, Laboratory of Advanced Theranostic Materials and Technology, Ningbo Institute of Materials Technology and Engineering, Chinese Academy of Sciences, Ningbo 315300, P. R. China.

<sup>c</sup> Department of Clinical Laboratory, Ningbo No. 2 Hospital, Ningbo 315010, P.R. China.

<sup>+</sup> These authors contributed equally to this work.

<sup>\*</sup> Corresponding authors. E-mail: liaoyufengs@163.com; liwang@jlnu.edu.cn; zhengjianping@nimte.ac.cn

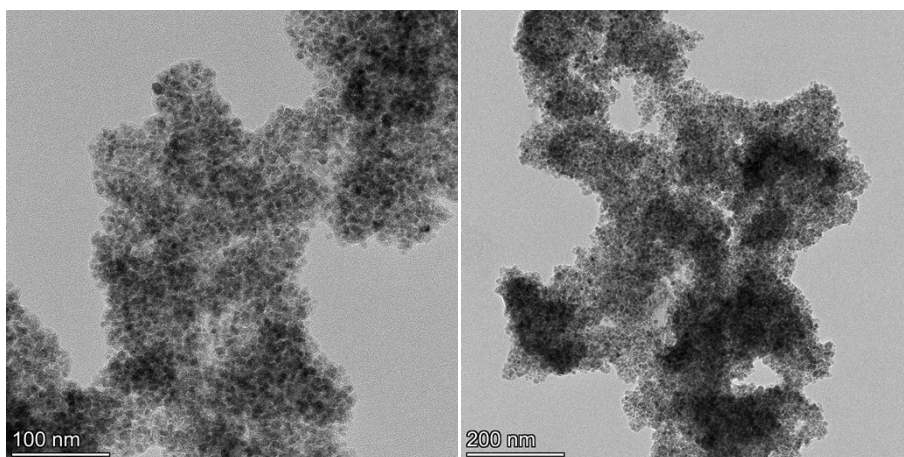

**Fig. S1** TEM images of  $\text{Fe}_3\text{O}_4$  nanoparticles; their average diameter was 5~10 nm; the scale bar corresponds to 100 nm (left) and 200 nm (right).

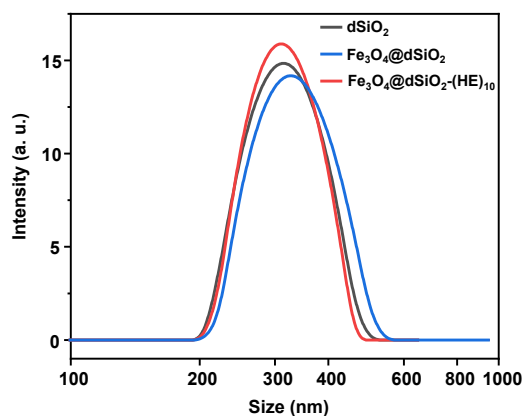

**Fig. S2** Hydrodynamic diameters of  $\text{dSiO}_2$ ,  $\text{Fe}_3\text{O}_4@\text{dSiO}_2$  and  $\text{Fe}_3\text{O}_4@\text{dSiO}_2\text{-(HE)}_{10}$  determined by DLS measurements.

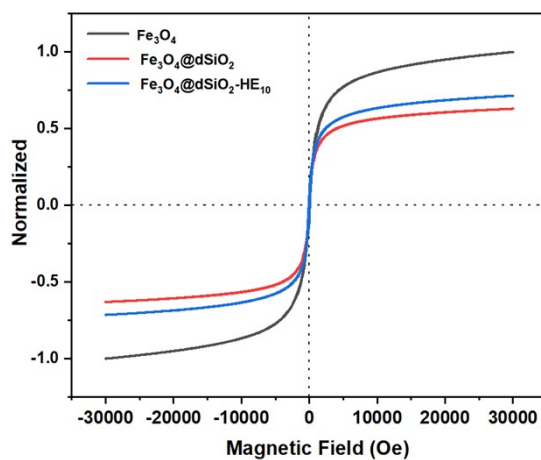

**Fig. S3** The normalized magnetic hysteresis curves of  $\text{Fe}_3\text{O}_4$ ,  $\text{Fe}_3\text{O}_4@\text{dSiO}_2$  and  $\text{Fe}_3\text{O}_4@\text{dSiO}_2\text{-(HE)}_{10}$  at 300 K.

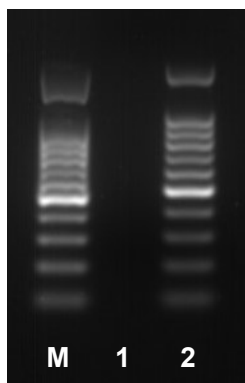

**Fig. S4** 1% Agarose gel electrophoresis of DNA marker. Lane M: 100 bp DNA marker; lane 1: Supernatant of Dynabeads MyOne Silane; lane 2: Elution of Dynabeads MyOne Silane.

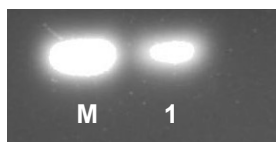

**Fig. S5** Extraction of PCR amplification products from human genomic DNA. Lane M: Marker; Lane 1: Elution of  $\text{Fe}_3\text{O}_4@\text{dSiO}_2\text{-(HE)}_{10}$ .
